# Supplementary material
Source: publisher figshare collection journal article supplement (https://acs.figshare.com/ndownloader/files/5572403)
Supplement: Supplementary file 1 [file 5572403]

## Sheet: MH MeCN
Keq directionality
M+ + B + H2 = MH + BH+ (atm-1)
MH + Bref = M- + BH+ref
MH + A+ref = M+ + AHref
Hydride Donor	Row	Method of Determination	Hydricity (kcal/mol)	pKa	BDFE (kcal/mol)	ΔGH2 (kcal/mol)	E1 (1e– )	E2 (1e– )	E3 (2e– )	Reference for Determination	Keq	pKa / hydricity of reference	Reference
[Pt(EtXantphos)2H]+	3	potential-pKa	77.1544	28.3	69.833		-0.81	-0.97		Ni(dmpe)2	0.001	25.3	Organometallics 2004, 23, 2670-2679
[Co(CpC5F4N)(PR2NR′2)H]+ ; R = tBu, R′ = Ph	1	potential-pKa	72.988	15.609			-0.26	-0.95		benzylamine	20	16.91	Organometallics 2014, 33, 5820-5833
cis-[Rh(depx)2(H)2]+	2	H2 heterolysis	71.6	30.5			-0.91	-1.26		thioacetamide / benzamide		4.7 / 3.7	Organometallics 2005, 24, 110-118
[Pd(EtXantphos)2H]+	2	potential-pKa	70.8838	18.8	57.5668		-0.55	-0.94		NEt3	1	18.8	J. Am. Chem. Soc. 2004, 126, 5502-5514
[Rh(dppp)2(H)2]+	2	pKa-H2 addition	69.216	6		-1.4				HDMF / HDMSO		6.1 / 5.8	Inorg. Chem. 2010, 49, 3918-3926
[Ni(dppp)(PR2NR′2H)]+ ; R = Ph, R′ = Bn	1	potential-pKa	68.2491	18.0518			-0.52	-1.04		NEt3	5.6	18.8	J. Am. Chem. Soc. 2009, 131, 5935-5945
[W(Cp)(CO)2(IMes)H]+	3	potential-hydricity	67.7382				0.34	-0.13		W(Cp)(CO)2(IMes)H (w/ MeCN binding)		56.9	J. Am. Chem. Soc. 2011, 133, 14604-14613
[Ni(dppv)2H]+	1	potential-pKa	67.3721	13.8586	53.3633		-0.52	-0.83		p-methoxyaniline	0.011	11.9	Organometallics 2001, 20, 1832-1839
[Ni(PNP)2H]+	1	potential-pKa	66.9381	22.5007			-0.64	-1.24		[Pt(dppe)2H]+	0.63	22.3	Inorg. Chem. 2003, 42, 216-227
[Pd(depPE)2H]+	2	potential-pKa	66.9232	18.6013	57.757		-0.73	-0.92		NEt3	1.58	18.8	J. Am. Chem. Soc. 2004, 126, 5502-5514
[Ni(depp)2H]+	1	H2 heterolysis	66.2972	22.707	53.672		-0.58	-1.34		2,4-dichloroaniline	7.7	8	J. Am. Chem. Soc. 2002, 124, 1918-1925
cis-[Co(dppe)2(H)2]+	1	H2 heterolysis	65.1445	22.8	57.9496		-0.83	-1.16		2,4-dichloroaniline	1.1	8	J. Am. Chem. Soc. 2002, 124, 2984-2992
[Rh(dcpe)2(H)2]+	2	pKa-H2 addition	63.8888	5.8		4.2				HDMF / HDMSO		6.1 / 5.8	Inorg. Chem. 2010, 49, 3918-3926
[Ni(PR2NR′2)2H]+ ; R = Cy, R′ = Ph	1	H2 heterolysis	63.6995	17.2523			-0.62	-1.09		p-bromoaniline	2.41	9.4	J. Am. Chem. Soc. 2011, 133, 12767-12779
[Ni(dppe)2H]+	1	potential-pKa	62.7878	14.3861	52.9298		-0.7	-0.88		pyridine	0.013	12.5	J. Am. Chem. Soc. 1999, 121, 11432-11447
[Ir(Cp*)(bpy)H]+	3	potential-pKa	62	23.3					-1.07	DBU		24.34	J. Am. Chem. Soc. 2014, 136, 14718-14721
[Pd(depx)2H]+	2	potential-pKa	61.8202	20.101	57.4966		-0.94	-1.02		NEt3	0.05	18.8	J. Am. Chem. Soc. 2004, 126, 5502-5514
Fe(Cp)(CO)2(H)	1	potential-pKa	61.6824	27.1006			-1.11	-1.27		TBD: 1,5,7-triazabicyclo[4.4.0]dec-5-ene	0.085	26.03	Organometallics 2011, 30, 3444-3447
[Rh(depp)2(H)2]+	2	H2 heterolysis	61.3	14.4		-5.1				p-methoxyaniline / aniline		11.9 / 10.6	Inorg. Chem. 2010, 49, 3918-3926
[Ni(PR2NR′2)2H]+ ; R = Cy, R′ = tBu	1	potential-pKa	60.9648	24.5458			-0.81	-1.45		MTBD	9	25.5	J. Am. Chem. Soc. 2013, 135, 9700-9712
[Ni(PR2NR′2)2H]+ ; R = Cy, R′ = Bn	1	pKa-H2 addition	60.8825	21.4423		-3.1	-0.8	-1.28		p-methoxyaniline	0.035	11.9	Organometallics 2007, 26, 3918-3924
[Ni(dmpp)2H]+	1	H2 heterolysis	60.7288	23.6965	55.2522		-0.89	-1.33		p-bromoaniline	0.016	9.4	J. Am. Chem. Soc. 2002, 124, 1918-1925
[Co(dppe)2H]+	1	potential-pKa	60.5498	11.9	53.6896		-0.7	-0.83		p-methoxyaniline	1	11.9	J. Am. Chem. Soc. 2002, 124, 2984-2992
[Ni(PR2NR′2)( PR′′2NR′2)H]+ ; R = R′ = Ph, R′′ = Cy	1	H2 heterolysis	60.4989	16.5964			-0.76	-1.05		aniline	0.172	10.6	J. Am. Chem. Soc. 2011, 133, 12767-12779
[Rh(dppe)2(H)2]+	2	pKa-H2 addition	60.2142	8.78722		3.8				p-bromoaniline	4.1	9.4	Inorg. Chem. 2010, 49, 3918-3926
[Ni(dedpe)2H]+	1	potential-pKa	59.9586	20.5959	56.788		-0.99	-1.08		NEt3	0.016	18.8	Organometallics 2001, 20, 1832-1839
[Ni(PR2NR′2)2H]+ ; R = Bn, R′ = Ph	1	H2 heterolysis	59.4	18.1576			-0.83	-1.12					Inorg. Chem. 2011, 50, 10908-10918
[Ni(PR2NR′2)2H]+ ; R = Ph, R′ = Ph	1	H2 heterolysis	59.0552	16.3833			-0.84	-1.02		p-methoxyaniline	0.3	11.9	Organometallics 2007, 26, 3918-3924
[Ni(PR2NR′2)2H]+ ; R = Cy, R′ = CH2-C6H4-OMe	1	potential-pKa	58.7734	22.601			-0.85	-1.39		TMG	5	23.3	Organometallics 2012, 31, 6719-6731
[Ni(PR2NR′2)2H]+ ; R = Ph, R′ = C6H4-OMe	1	H2 heterolysis	58.5995	17.4017			-0.87	-1.07		p-methoxyaniline	0.139	11.9	J. Am. Chem. Soc. 2011, 133, 12767-12779
[Ni(PR2NR′2)2H]+ ; R = 2-phenylethyl, R′ = Ph	1	H2 heterolysis	57.8	18.8443			-0.9	-1.16					Inorg. Chem. 2011, 50, 10908-10918
Mo(Cp*)(PMe3)(CO)2H	2	hydride transfer	57.6984							BzNAD+	9	59	J. Am. Chem. Soc. 2004, 126, 2738-2743
[Ni(PR2NR′2)2H]+ ; R = 2,4,4-trimethylpentyl, R′ = Ph	1	H2 heterolysis	57.6	18.6977			-0.89	-1.17					Inorg. Chem. 2011, 50, 10908-10918
[Ni(dhmpe)2H]+	1	H2 heterolysis	57.5962		53.6					lutidine	4.34	14.13	J. Am. Chem. Soc. 2015, 137, 14114-14121
[Ni(PR2NR′2)2H]+ ; R = Ph, R′ = Bn	1	H2 heterolysis	57.1958	19.5848			-0.94	-1.19		p-methoxyaniline	0.013	11.9	Organometallics 2007, 26, 3918-3924
[Ni(PR2NR′2)2H]+ ; R = nBu, R′ = Ph	1	H2 heterolysis	57.1	20.0217			-0.93	-1.23					Inorg. Chem. 2011, 50, 10908-10918
[Ir(terpy)(ppy)H]+	3	calorimetry	57							(4-AcNH-TEMPO)+	enthalpy = -43 kcal/mol by calorimetry	98.8	Angew. Chem., Int. Ed. 2015, 54, 14128-14132
W(Cp)(CO)2(IMes)H	3	potential-pKa	56.9294	31.9			-1.22	-1.65		Verkade's base	10	32.9	J. Am. Chem. Soc. 2011, 133, 14604-14613
[Ru(terpy)(bpy)H]2+	2	potential-hydricity	56.595				0.91	0.16		[Ru(tpy)(bpy)H]+		39.3	J. Am. Chem. Soc. 2012, 134, 15743-15757
[Ni(depe)2H]+	1	H2 heterolysis	55.289	23.5968	56.0386		-1.16	-1.29		p-methoxyaniline	0.00052	11.9	J. Am. Chem. Soc. 2002, 124, 1918-1925
Mo(Cp)(PMe3)(CO)2(H)	2	calorimetry	55							[Ph3C]+	enthalpy = -42.6 kcal/mol by calorimetry	99	J. Am. Chem. Soc. 2004, 126, 2738-2743
[Fe(SiP3)(H2)(H)]+	1	H2 heterolysis	54.6056							proton sponge (THF)	2.6	16.1	Inorg. Chem. 2015, 54, 5124-5135
[Pd(depp)2H]+	2	potential-pKa	54.5696	22.9003	56.7028				-1.22	TMG	2.51	23.3	J. Am. Chem. Soc. 2004, 126, 5502-5514
[Pt(PNP)2H]+	3	H2 heterolysis	54.3092	27.4431					-1.36	NEt3	790	18.8	Organometallics 2004, 23, 511-516
[Ru(C6Me6)(bpy)H]+	2	potential-pKa	54.034	22.5076					-1.22	TMG	6.2	23.3	J. Am. Chem. Soc. 2012, 134, 15743-15757
[Ni(PR2NR′2)2H]+ ; R = Me, R′ = Ph	1	H2 heterolysis	54.0046	20.4573			-1.03	-1.29		2,4,6-trimethylpyridine	0.0715	14.98	ACS Catal. 2012, 2, 720-727
[Pt(depp)2H]+	3	H2 heterolysis	53.6933	28.3441	59.9773				-1.4	pyridine	0.00014	12.5	J. Am. Chem. Soc. 2002, 124, 1918-1925
[Pt(dppe)2H]+	3	potential-pKa	52.8214	22.2949	55.4158				-1.24	NEt3	0.00032	18.8	J. Am. Chem. Soc. 1999, 121, 11432-11447
[Rh(depe)2(H)2]+	2	pKa-H2 addition	51.9418	17.0001		0.87				proton sponge	39.8	18.6	Inorg. Chem. 2010, 49, 3918-3926
[Pd(PNP)2H]+	2	hydride transfer	50.681	19.7113					-1.21	[Pt(PNP)2H]+	450	54.3	Organometallics 2004, 23, 511-516
[Pt(dmpp)2H]+	3	H2 heterolysis	50.6711	30.524	59.9529				-1.53	NEt3	1.7	18.8	J. Am. Chem. Soc. 2002, 124, 1918-1925
[Rh(dmpe)2(H)2]+	2	pKa-H2 addition	49.9458	19.4239		-0.44				proton sponge	0.15	18.6	Inorg. Chem. 2010, 49, 3918-3926
Co(dppe)2H	1	potential-pKa	49.9422	11.9			-0.83	-1.16		p-methoxyaniline	1	11.9	J. Am. Chem. Soc. 2002, 124, 2984-2992
[Ni(dmpe)2H]+	1	H2 heterolysis	49.9342	25.25	55.9876				-1.39	NEt3	0.49	18.8	J. Am. Chem. Soc. 2002, 124, 1918-1925
Rh(Cp*)(ppy)H	2	H2 heterolysis	49.6027	30.3	52.2682		-1.2	-1.85		NEt3	0.28	18.8	J. Am. Chem. Soc. 2014, 136, 5938-5948
[Fe4N(CO)12(H)]–	1	H2 heterolysis	49	20.3						benzoic acid / NEt3		20.7 / 18.8	ACS Catal. 2015, 5, 7140-7151
[Co(P4N2)H]+	1	potential-pKa	46.7445	15.98			-0.82	-1.55		2,4,6-trimethylpyridine	0.1	14.98	Inorg. Chem. 2013, 52, 14391-14403
Rh(depx)2H	2	pKa-hydricity	46.5	12.1218			-2.21	-2.33		p-methoxyaniline	0.6	11.9	Organometallics 2005, 24, 110-118
[Fe4N(CO)11(PPh3)(H)]–	1	H2 heterolysis	46	24						butyric acid / benzoic acid		22.7 / 20.7	Chem. Sci. 2016, DOI: 10.1039/C5SC03169A
[Pt(depe)2H]+	3	potential-pKa	44.016	29.7024	56.065				-1.65	KOPh	0.00079	26.6	(1) J. Am. Chem. Soc. 1999, 121, 11432-11447 (2) corrected in J. Am. Chem. Soc. 2002, 124,1918-1925
[Fe4C(CO)12(H)]2–	1	H2 heterolysis	44	25						benzenesulfonamide / butryric acid		24.6 / 22.7	Inorg. Chem. 2016, 55, 378-85
[Pd(depe)2H]+	2	potential-pKa	42.9867	23.1996	51.1155				-1.48	TMG	1.26	23.3	J. Am. Chem. Soc. 2004, 126, 5502-5514
Co(CpC5F4N)(PR2NR′2)H ; R = tBu, R′ = Ph	1	potential-pKa	41.857	15.609			-0.95	-1.61		benzylamine	20	16.91	Organometallics 2014, 33, 5820-5833
[Pt(dmpe)2H]+	3	H2 heterolysis c	41.4218	30.5054	55.3156				-1.73	TMG	0.0089	23.3	J. Am. Chem. Soc. 2002, 124, 1918-1925
[W(CO)5H]–	3	calorimetry	40							[(p-Me2NC6H4)3C]+	enthalpy = -31 kcal/mol by calorimetry	74.2	J. Am. Chem. Soc. 2003, 125, 12230-12236
[Ru(terpy)(bpy)H]+	2	hydride transfer	39.3287	32.3521			-1.68	-1.98		DMPy+	16.8	41	J. Am. Chem. Soc. 2012, 134, 15743-15757
[W(CO)4(P(OMe)3)H]–	3	hydride transfer	37.004							Cp*Re(NO)(PMe3)(CHO)	4600	42	J. Am. Chem. Soc. 2003, 125, 12230-12236
[W(CO)4(PPh3)H]–	3	calorimetry	36							[(p-Me2NC6H4)3C]+	enthalpy = -35 kcal/mol by calorimetry	74.2	J. Am. Chem. Soc. 2003, 125, 12230-12236
Rh(dppb)2H	2	H2 heterolysis	34.0205	34.8848					-2.02	Pt(dmpp)2	0.42	30.4	Organometallics 2002, 21, 4833-4839
Ru(terpy)(bpy)H	2	potential-hydricity	32.382				-1.68	-1.98		[Ru(tpy)(bpy)H]+		39.3	J. Am. Chem. Soc. 2012, 134, 15743-15757
Rh(PR2NR′2)2H ; R = Cy, R′ = Ph	2	H2 heterolysis	31.9033	45.8432		0			-2.39	Verkade's base	20	33.63	J. Am. Chem. Soc. 2015, 137, 8251-8260
Co(P4N2)H	1	potential-pKa	31.7555	15.98			-1.55	-1.47		2,4,6-trimethylpyridine	0.1	14.98	Inorg. Chem. 2013, 52, 14391-14403
Rh(PR2NR′2)2H ; R = Ph, R′ = C6H4-OMe	2	H2 heterolysis	31.2528	41.3088		0.73			-2.27	Verkade's base	6.67	33.63	J. Am. Chem. Soc. 2015, 137, 8251-8260
Rh(PR2NR′2)2H ; R = Cy, R′ = C6H4-OMe	2	H2 heterolysis	30.1851	46.6123		0.42			-2.45	Verkade's base	1.1	33.63	J. Am. Chem. Soc. 2015, 137, 8251-8260
Rh(PR2NR′2)2H ; R = Ph, R′ = Bn	2	H2 heterolysis	28.3541	44.5936		0.44			-2.43	Verkade's base	0.05	33.63	J. Am. Chem. Soc. 2015, 137, 8251-8260
Rh(depe)2H	3	hydride transfer	28.3075							Rh(dmpe)2H	0.056	26.6	J. Am. Chem. Soc. 2009, 131, 14454-14465
[Ru(terpy)(bpy)H]–	2	potential-hydricity	26.635				-1.98	-2.23		[Ru(terpy)(bpy)H]+		32.4	J. Am. Chem. Soc. 2012, 134, 15743-15757
Rh(dmpe)2H	2	pKa-H2 addition	26.5856	36.5208		-0.4				Verkade's base	0.0012	33.6	J. Am. Chem. Soc. 2009, 131, 14454-14465
[Ir(Cp*)(bpy)(H)]+*	3	potential-pKa*	14	-12					-1.07				J. Am. Chem. Soc. 2014, 136, 14718-14721
